# Supplementary material for: Effect of degree of hydrolysis of whey protein on in vivo plasma amino acid appearance in humans
Source: PubMed Central journal article supplement (PMC4814394; doi:10.1186/s40064-016-1995-x), 2016-03-31

## **Additional file 1**

**Fig SIa-c.** The kinetic model (solid line) that was described by equation 7 was fitted to the measured plasma (**SIa**) total amino acids (TAA), (**SIb**) essential amino acids (EAA), and (**SIc**) leucine concentrations (open circles) for each subject 1-5 following ingestion of the supplements: High DH, Medium DH, Low DH and Casein. Time points for measurements were: prior to and at 10, 20, 30, 45, 60, 90, and 120 min after ingestion of the supplement. From these fits of the mean estimated rate constant of plasma appearance,  $k_1$ , of TAA, EAA and leucine for each supplement was found.

NB. Measurements for the Low DH supplement for subject 2 were excluded from the  $k_1$  estimation since the subject by a mistake ingested water following supplement ingestion. This may have delayed the plasma appearance of TAA, EAA, and leucine.

**Fig SIa** The fit of the kinetic model to the total amino acid concentration for each supplement and subject

**Fig SIb** The fit of the kinetic model to the essential amino acid concentration for each supplement and subject

**Fig SIc** The fit of the kinetic model to the leucine concentration for each supplement and subject

**Fig S1a**

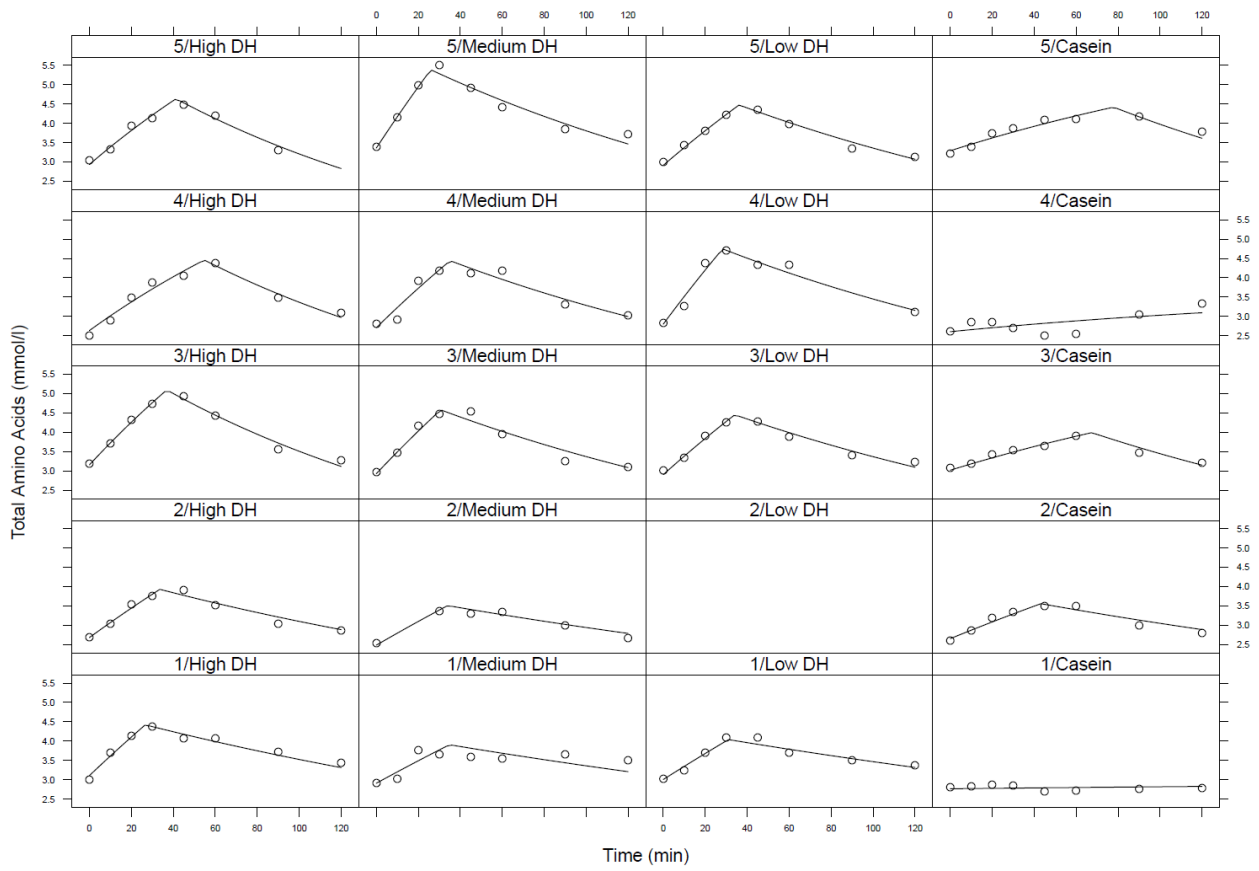

**Fig S1b**

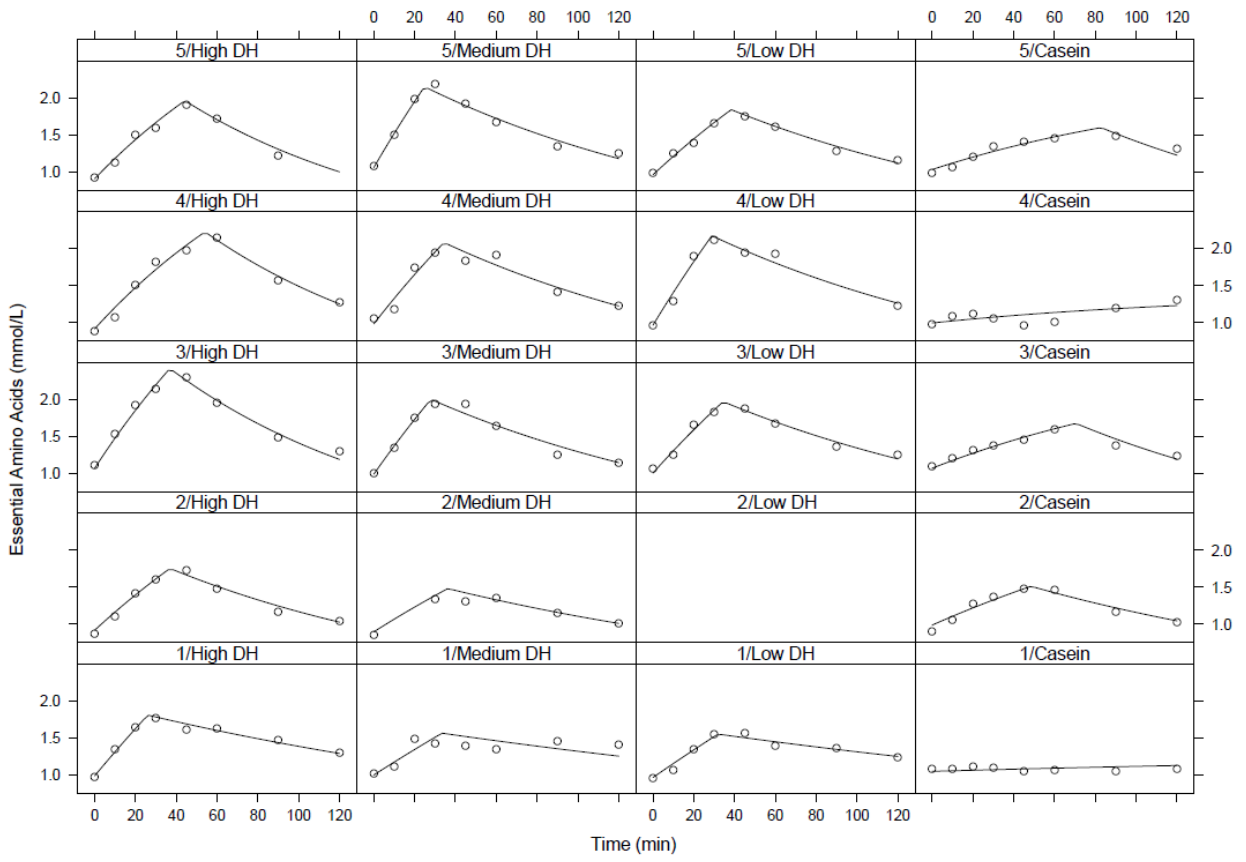



**Fig SII**

Population fitted, individual-fitted, and the individual-drink fitted concentrations estimated by the kinetic model are plotted against the actual measured concentrations of total amino acids (upper panel), essential amino acids (middle panel), and leucine (lower panel).

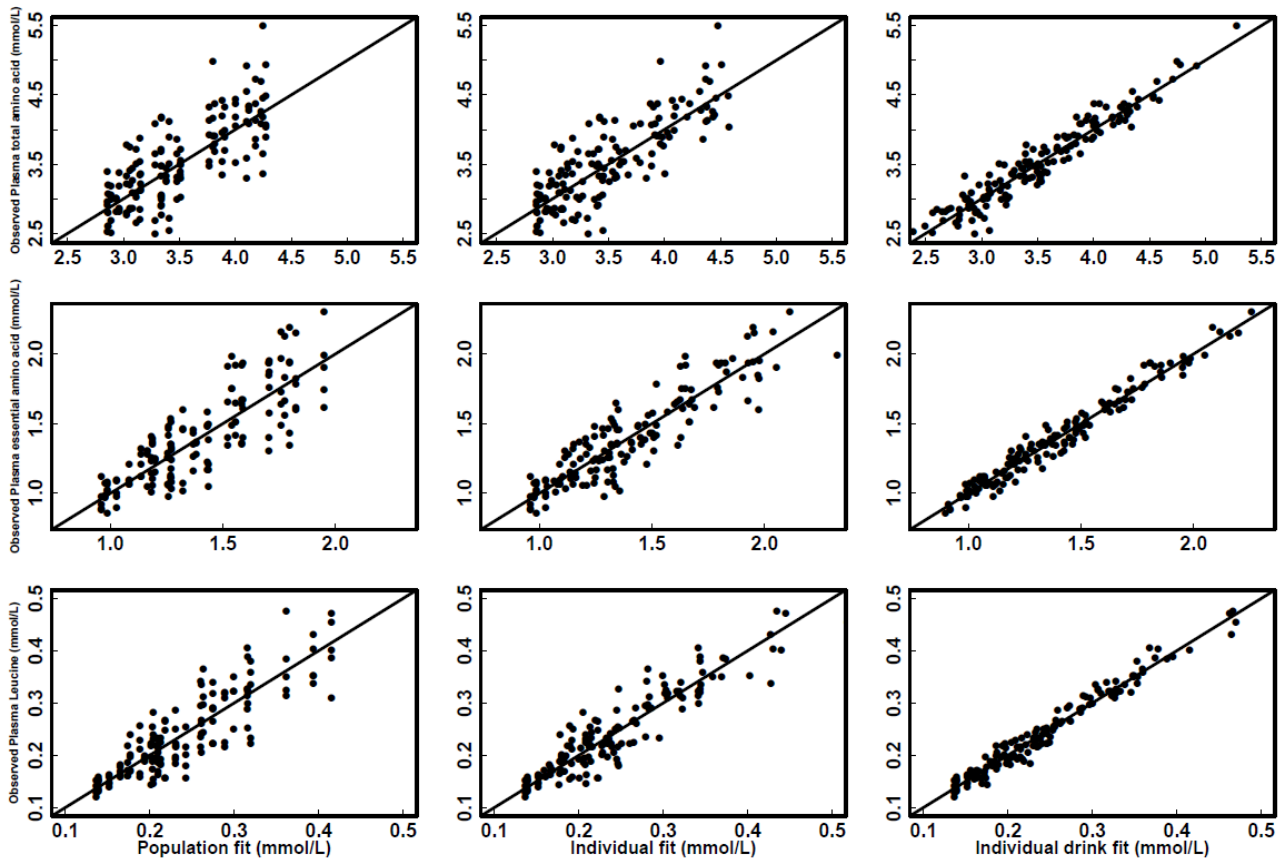

Supplement: 40064_2016_1995_MOESM1_ESM.pdf [file 40064_2016_1995_MOESM1_ESM.pdf]
